# Supplementary material for: Shear-induced structuration of confined carbon black gels: steady-state features of vorticity-aligned flocs
Source: Royal Society of Chemistry journal article supplement (doi:10.1039/c0sm01515f), 2011-01-01
Supplement: c0sm01515f.pdf [file c0sm01515f.pdf]

ESI attached to this manuscript include movies (AVI format with XVID codec) of the shear-induced structuration of carbon black gels under simple plane shear with a gap width of 173  $\mu\text{m}$ .

File name : CB\_0p25pc\_h173\_g1p3.avi (Movie 1)  
concentration = 0.25 % w/w and shear rate = 1.3 1/s at large magnification

File name : CB\_0p5pc\_h173\_g1p3.avi (Movie 2)  
concentration = 0.5 % w/w and shear rate = 1.3 1/s at small magnification

File name : CB\_1pc\_h173\_g0p4.avi (Movie 3)  
concentration = 1 % w/w and shear rate = 0,4 1/s at large magnification

File name : CB\_2pc\_h173\_g1p8.avi (Movie 4)  
concentration = 2 % w/w and shear rate = 1.8 1/s at small magnification
